# Supplementary material
Source: Copernicus journal article supplement (doi:10.5194/gmd-19-4999-2026)
Supplement: Supplementary file [file gmd-19-4999-2026-supplement-title-page.pdf › gmd-19-4999-2026-supplement-title-page.pdf]

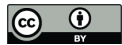

## *Supplement of*

# **MIPV-NWP-PINNs V1.0: development of a multi-scale photovoltaic power forecasting framework integrating numerical weather prediction with physics-informed neural networks**

**Fei Zhang et al.**

*Correspondence to:* Xingcai Li (nxulixc2011@126.com) and Xueshun Chen (chenxsh@mail.iap.ac.cn)

- gmd-19-4999-2026-supplement-title-page.pdf
- supplement
  - Figure S1-S9.docx
  - Table S1 .docx
  - Table S2.docx

The copyright of individual parts of the supplement might differ from the article licence.
